# Supplementary material
Source: PubMed Central journal article supplement (PMC3488083)
Supplement: supp_M112.412577_jbc.M112.412577-1.pdf [file supp_M112.412577_jbc.M112.412577-1.pdf]

## SUPPLEMENTAL INFORMATION

Domain Organization of the Polymerizing Mannosyltransferases Involved in Synthesis of the *Escherichia coli* O8 and O9a Lipopolysaccharide O Antigens

**Laura K. Greenfield, Michele R. Richards, Evgeny Vinogradov, Warren W. Wakarchuk, Todd L. Lowary, and Chris Whitfield\***

\*To whom correspondence may be addressed: Chris Whitfield, Department of Molecular and Cellular Biology, Science Complex, University of Guelph, Guelph, Ontario N1G 2W1 Canada. Tel.: 519-824-4120, Ext. 53361; FAX: 519-837-3273; E-mail: [cwhitfie@uoguelph.ca](mailto:cwhitfie@uoguelph.ca).

**Table S1: Primer sequences used for the production of recombinant plasmids and site-directed mutants.**

| Primer       | Sequence <sup>a,b,c</sup> (5' → 3')                                       | Features                                                                                                                                                           |
|--------------|---------------------------------------------------------------------------|--------------------------------------------------------------------------------------------------------------------------------------------------------------------|
| WbdCE275AFwd | CGCATCTGCGCTCTGCGGCG<br>TTTGGC                                            | Forward primer used to generate the E275A mutation of WbdC <sup>O9a</sup> in the creation of pWQ583                                                                |
| WbdCE275ARev | CGTAATGCCAAACGCCGCA<br>GAGCGCAG                                           | Reverse primer used to generate the E275A mutation of WbdC <sup>O9a</sup> in the creation of pWQ583                                                                |
| WbdCE283AFwd | GGCATTACGTTATTGGCAGG<br>CGCACGC                                           | Forward primer used to generate the E283A mutation of WbdC <sup>O9a</sup> in the creation of pWQ584                                                                |
| WbdCE283ARev | CTTGCAAAGCGTGCGCCTGC<br>CAATAACG                                          | Reverse primer used to generate the E283A mutation of WbdC <sup>O9a</sup> in the creation of pWQ584                                                                |
| WbdBE294AFwd | GTTTATCCCTCCTTCTATGCG<br>GGATTCGGTTTACC                                   | Forward primer used to generate the E294A mutation of WbdB <sup>O9a</sup> in the creation of pWQ585                                                                |
| WbdBE294ARev | CAAGAATAGGTAAACCGAA<br>TCCCGCATAGAAGGAGGG                                 | Reverse primer used to generate the E294A mutation of WbdB <sup>O9a</sup> in the creation of pWQ585                                                                |
| WbdBE302AFwd | GATTCGGTTTACCTATTCTTG<br>CAGCGATGTCTTGC                                   | Forward primer used to generate the E302A mutation of WbdB <sup>O9a</sup> in the creation of pWQ586                                                                |
| WbdBE302ARev | CACACCGCAAGACATCGCTG<br>CAAGAATAGG                                        | Reverse primer used to generate the E302A mutation of WbdB <sup>O9a</sup> in the creation of pWQ586                                                                |
| LG33         | gatcgaattccatcatcatcatcatcatcat<br>catcatcatCATATTTTGATTGAT<br>GTCCAGGG   | Forward primer used for the amplification of <i>wbdA</i> <sub>1-1305</sub> <sup>O9a</sup> in the creation of pWQ590; <i>EcoRI</i> restriction site                 |
| LG34         | gatcaagcttTTATTCGCTCAGCG<br>CATCGATTTTCTGC                                | Reverse primer used for the amplification of <i>wbdA</i> <sub>1-1305</sub> <sup>O9a</sup> in the creation of pWQ590; <i>HindIII</i> restriction site               |
| LG35         | gatcgaattccatcatcatcatcatcatcat<br>catcatcatcatCAGAAAATCGATG<br>CGCTGAGCG | Forward primer used for the amplification of <i>wbdA</i> <sub>1279-2520</sub> <sup>O9a</sup> in the creation of pWQ591 and pWQ632; <i>EcoRI</i> restriction site   |
| LG10         | gatcaagcttTTATTGCTTCGCGG<br>CTGGCGCG                                      | Reverse primer used for the amplification of <i>wbdA</i> <sub>1279-2520</sub> <sup>O9a</sup> in the creation of pWQ591 and pWQ632; <i>HindIII</i> restriction site |
| LG101        | gatcgaccATGgtaCGTATTGTCA<br>TAGATTTACAAGGCG                               | Forward primer used for the amplification of <i>wbdA</i> <sup>O8</sup> in the creation of pWQ592, pWQ593 and pWQ595; <i>NcoI</i> restriction site                  |
| LG105        | gatcgatctagaTTATGCCGTTTTC<br>AGATTGTAATC                                  | Reverse primer used for the amplification of <i>wbdA</i> <sub>1-1350</sub> <sup>O8</sup> in the                                                                    |

|              |                                                |                                                                                                                                                                                                                                  |
|--------------|------------------------------------------------|----------------------------------------------------------------------------------------------------------------------------------------------------------------------------------------------------------------------------------|
| LG110        | gatcgaccATGgtaGCCGAGACGA<br>CAAAGATGTGG        | creation of pWQ592 and pQW593;<br><i>Xba</i> I restriction site<br>Forward primer used for the<br>amplification of <i>wbdA</i> <sub>1848-3642</sub> <sup>08</sup> in the<br>creation of pWQ594; <i>Nco</i> I restriction<br>site |
| LG104        | gatcgatctagaTTATTTAAAATAT<br>TTAGCTTTAGCTAAGCC | Reverse primer used for the<br>amplification of <i>wbdA</i> <sup>08</sup> in the<br>creation of pWQ594 and pWQ596;<br><i>Xba</i> I restriction site                                                                              |
| LG102        | gatcgatctagaTTAGCCATGAGGT<br>GCGCTTTC          | Reverse primer used for the<br>amplification of <i>wbdA</i> <sub>1-2595</sub> <sup>08</sup> in the<br>creation of pWQ595; <i>Xba</i> I restriction<br>site                                                                       |
| LG103        | gatcgaccATGgtaGCGCAGGTTT<br>TGCCTGAAGCTTTG     | Forward primer used for the<br>amplification of <i>wbdA</i> <sub>1234-3642</sub> <sup>08</sup> in the<br>creation of pWQ596; <i>Nco</i> I restriction<br>site                                                                    |
| WbdAE317AFwd | GTGTTCCCGTCGCTGCATGC<br>AGGTTTCGGCC            | Forward primer used to generate the<br>E317A mutation of WbdA <sup>09a</sup> in the<br>creation of pWQ597                                                                                                                        |
| WbdAE317ARev | GCGGCAGGCCGAAACCTGC<br>ATGCAGCGACG             | Reverse primer used to generate the<br>E317A mutation of WbdA <sup>09a</sup> in the<br>creation of pWQ597                                                                                                                        |
| WbdAE325AFwd | GCCTGCCGCCGCTGGCAGCG<br>ATGCGCTG               | Forward primer used to generate the<br>E325A mutation of WbdA <sup>09a</sup> in the<br>creation of pWQ598                                                                                                                        |
| WbdAE325ARev | CCCGCAGCGCATCGCTGCCA<br>GCGGCGGC               | Reverse primer used to generate the<br>E325A mutation of WbdA <sup>09a</sup> in the<br>creation of pWQ598                                                                                                                        |
| WbdAE750AFwd | CTTTGCCTCGCAGGGAGCAG<br>GCTTTGGC               | Forward primer used to generate the<br>E750A mutation of WbdA <sup>09a</sup> in the<br>creation of pWQ599 and pLG59                                                                                                              |
| WbdAE750ARev | CGGCAGGCCAAAGCCTGCTC<br>CCTGCGAG               | Reverse primer used to generate the<br>E750A mutation of WbdA <sup>09a</sup> in the<br>creation of pWQ599 and pLG59                                                                                                              |
| WbdAE758AFwd | GGCCTGCCGTTGATTGCAGC<br>GGCGCAG                | Forward primer used to generate the<br>E759A mutation of WbdA <sup>09a</sup> in the<br>creation of pWQ630 and pLG60                                                                                                              |
| WbdAE758ARev | GGCAGCTTTTCTGCGCCGC<br>TGCAATCAACGGC           | Reverse primer used to generate the<br>E759A mutation of WbdA <sup>09a</sup> in the<br>creation of pWQ630 and pLG60                                                                                                              |

<sup>a</sup> Restriction sites are underlined.

<sup>b</sup> Non-chromosomal sequence is shown in lower-case letters.

<sup>c</sup> Point mutations are bolded.

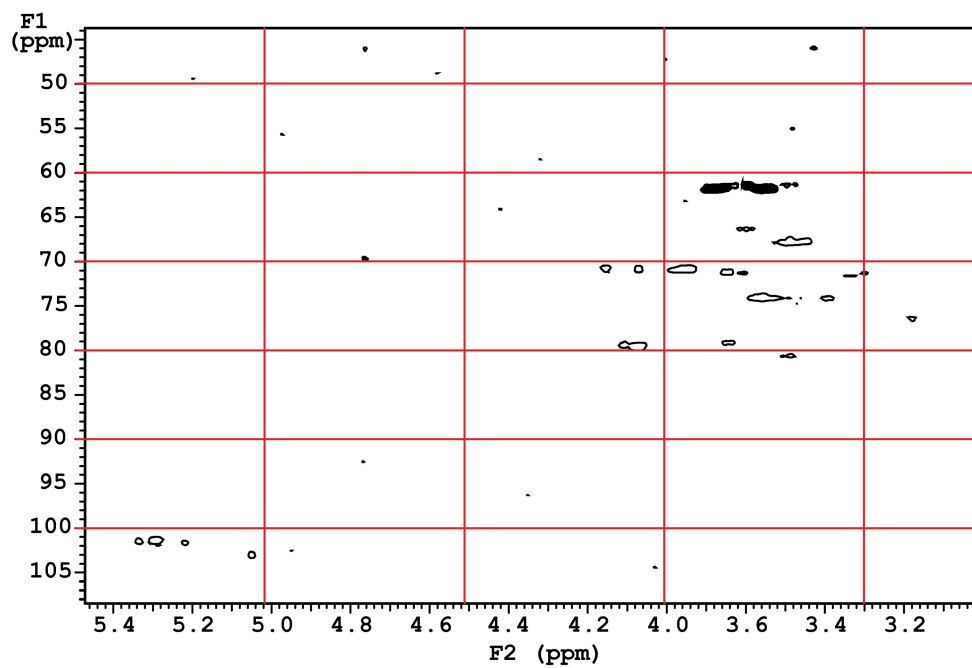

Figure S1:  $^1\text{H}$ - $^{13}\text{C}$  gHSQC spectrum for the products synthesized by N-WbdA<sup>09a</sup> using Acceptor B.
